# Supplementary material
Source: Springer Nature journal article supplement (https://www.springermedizin.de/resource/supplementary/12958_2011_977_MOESM1_ESM.pdf/9566476)

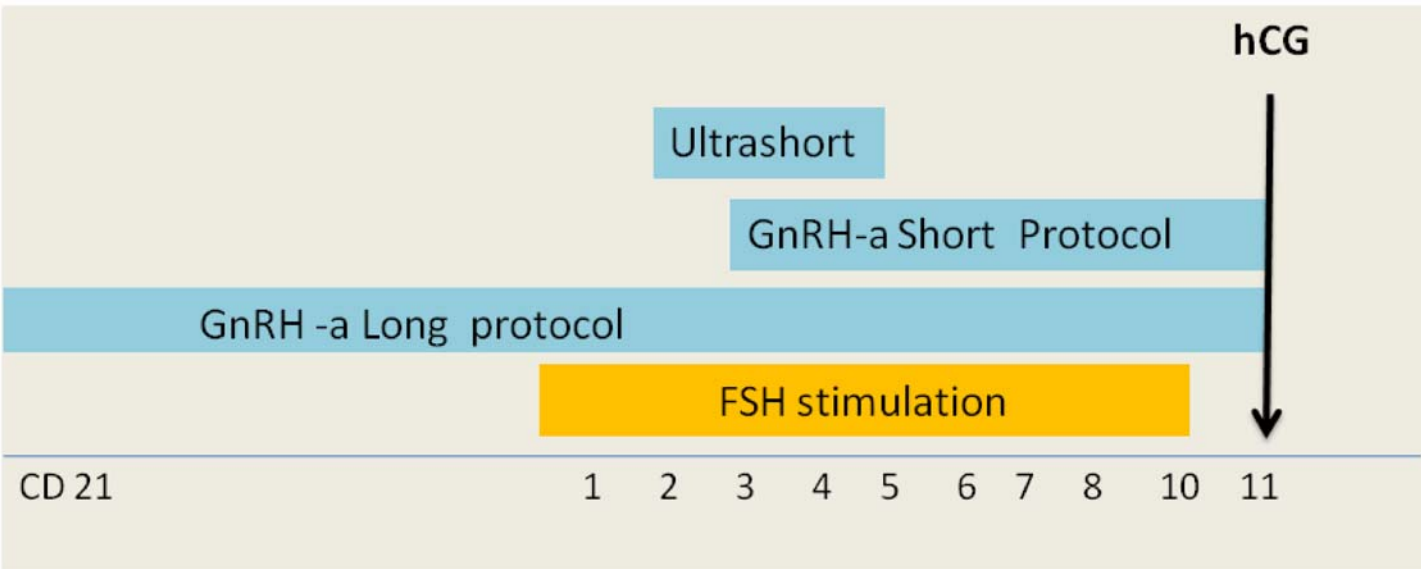

GnRH -a Long protocol

Ultrashort

GnRH-a Short Protocol

FSH stimulation

hCG

CD 21

1 2 3 4 5 6 7 8 10 11

Supplement: MOESM1 [file 9566476]
